# Supplementary material
Source: MDPI journal article supplement (https://www.mdpi.com/2071-1050/14/3/1434)
Supplement: s1 [file s1]

## CROP PRODUCTION DATA PRODUCED FROM 2017 TO 2019

**Please note:** In 2017 and 2018 all, the regions were under the Northern region until 2019 when the Northern region was divided into 3 regions namely the Northern, North East and Savannah regions

**Table S1: PRODUCTION FOR MAJOR CROPS IN THE NORTHERN REGION – 2017**  
(Figures in Metric Tonnes)

|                   | CROPS  |       |        |         |         |         |        |        |          |
|-------------------|--------|-------|--------|---------|---------|---------|--------|--------|----------|
| DISTRICT          | MAIZE  | RICE  | MILLET | SORGHUM | CASSAVA | YAM     | G/NUTS | COWPEA | SOYABEAN |
| Bole              | 14,454 | 1,432 | 1,028  | 5,279   | 43,875  | 95,767  | 3,225  | 1,262  | 1,358    |
| Bunkpurugu/Yunyoo | 2,568  | 629   | 3,344  | 3,678   | 5,408   | 6,523   | 4,020  | 6,442  | 4,886    |
| Central Gonja     | 9,600  | 7,317 | 299    | 601     | 35,547  | 56,406  | 5,520  | 609    | 908      |
| East Gonja        | 11,590 | 9,981 | 979    | 421     | 99,389  | 282,293 | 4,543  | 1,855  | 2,186    |
| Kpandai           | 2,573  | 3,801 | 210    | 8,064   | 84,840  | 228,765 | 4,020  | 1,194  | 8,006    |
| East Mamprusi     | 4,292  | 4,083 | 6,890  | 5,458   | 10,980  | 13,120  | 5,775  | 2,356  | 5,712    |
| Gushiegu          | 10,805 | 5,420 | 3,751  | 4,555   | 69,423  | 28,777  | 7,038  | 3,529  | 6,686    |
| Karaga            | 8,790  | 7,364 | 4,548  | 5,312   | 10,949  | 26,144  | 6,130  | 4,155  | 11,634   |
| Nanumba North     | 20,748 | 3,077 | 2,014  | 5,168   | 154,839 | 315,570 | 4,513  | 1,025  | 10,005   |
| Nanumba South     | 9,570  | 1,824 | 998    | 11,700  | 170,817 | 246,647 | 3,672  | 4,138  | 2,527    |

|                   |                |                |               |                |                  |                  |                |               |                |
|-------------------|----------------|----------------|---------------|----------------|------------------|------------------|----------------|---------------|----------------|
| Saboba            | 3,113          | 1,848          | 4,056         | 6,282          | 6,063            | 70,863           | 5,678          | 2,460         | 3,818          |
| Chereponi         | 4,516          | 2,842          | 1,908         | 1,785          | 4,430            | 10,328           | 1,506          | 1,892         | 7,086          |
| Savelugu/Nanton   | 21,410         | 16,236         | 1,301         | 2,814          | 16,598           | 80,710           | 16,934         | 9,414         | 10,609         |
| Sawla/Tuna/Kalba  | 10,875         | 2,940          | 7,517         | 8,674          | 17,914           | 19,800           | 10,256         | 3,174         | 954            |
| Tamale Metro      | 11,112         | 17,904         | 997           | 2,835          | 10,909           | 58,914           | 319            | 2,922         | 4,191          |
| Sagnerigu         | 7,140          | 3,713          | 79            | 758            | 2,408            | 2,646            | 714            | 752           | 1,280          |
| Tolon             | 21,018         | 18,375         | 2,766         | 5,460          | 64,958           | 66,120           | 9,217          | 7,097         | 7,090          |
| Kumbungu          | 6,050          | 9,750          | 1,356         | 2,400          | 9,000            | 9,600            | 1,100          | 660           | 1,372          |
| West Gonja        | 15,660         | 2,816          | 1,179         | 2,740          | 360,960          | 137,760          | 7,776          | 2,438         | 2,187          |
| North Gonja       | 5,655          | 775            | 89            | 70             | 11,050           | 1,200            | 1,850          | 114           | 757            |
| West Mamprusi     | 14,312         | 15,930         | 6,308         | 8,820          | 5,500            | 37,030           | 24,182         | 2,540         | 9,758          |
| Mamprugu Moagduri | 11,900         | 2,640          | 1,818         | 1,785          | 7,155            | 2,673            | 9,983          | 5,092         | 370            |
| Yendi             | 7,896          | 16,809         | 3,718         | 3,037          | 65,096           | 110,460          | 8,100          | 5,245         | 13,253         |
| Mion              | 7,840          | 12,953         | 3,768         | 8,216          | 26,664           | 54,005           | 6,570          | 4,115         | 15,047         |
| Tatale Sanguli    | 7,650          | 7,033          | 4,030         | 4,176          | 71,909           | 159,793          | 5,694          | 1,486         | 1,193          |
| Zabzugu           | 8,310          | 4,860          | 4,814         | 4,538          | 63,876           | 178,352          | 7,293          | 815           | 624            |
| <b>Total</b>      | <b>259,447</b> | <b>182,352</b> | <b>69,766</b> | <b>114,626</b> | <b>1,430,557</b> | <b>2,300,266</b> | <b>165,630</b> | <b>76,781</b> | <b>133,495</b> |

Source: Statistics, Research and Info. Directorate (SRID), Min. of Food & Agric.- March, 2018

**Table S2: PRODUCTION FOR MAJOR CROPS IN THE NORTHERN REGION – 2018**  
(Figures in Metric Tonnes)

|                   | <b>CROPS</b> |             |               |                |                |            |               |               |                 |
|-------------------|--------------|-------------|---------------|----------------|----------------|------------|---------------|---------------|-----------------|
| <b>DISTRICT</b>   | <b>MAIZE</b> | <b>RICE</b> | <b>MILLET</b> | <b>SORGHUM</b> | <b>CASSAVA</b> | <b>YAM</b> | <b>G/NUTS</b> | <b>COWPEA</b> | <b>SOYABEAN</b> |
| Bole              | 7,980        | 1,320       | 735           | 3,969          | 45,000         | 83,200     | 2,502         | 1,300         | 1,200           |
| Bunkpurugu/Yunyoo | 2,640        | 528         | 4,659         | 3,949          | 5,164          | 6,230      | 2,867         | 6,138         | 6,000           |
| Central Gonja     | 6,430        | 5,152       | 490           | 1,100          | 36,848         | 55,300     | 5,625         | 1,332         | 1,500           |
| East Gonja        | 9,120        | 9,534       | 1,467         | 819            | 98,235         | 269,590    | 11,570        | 3,168         | 4,396           |
| Kpandai           | 2,160        | 2,145       | 115           | 6,765          | 119,238        | 315,000    | 3,900         | 1,274         | 6,615           |
| East Mamprusi     | 4,292        | 6,528       | 10,094        | 4,502          | 6,650          | 8,659      | 5,684         | 6,710         | 6,227           |
| Gushiegu          | 9,801        | 6,650       | 4,200         | 4,913          | 66,871         | 28,002     | 9,025         | 3,865         | 7,611           |
| Karaga            | 10,988       | 6,110       | 3,328         | 4,260          | 10,290         | 19,800     | 5,528         | 1,830         | 5,520           |
| Nanumba North     | 9,986        | 2,503       | 3,052         | 7,449          | 155,743        | 272,000    | 7,929         | 2,057         | 10,329          |
| Nanumba South     | 9,100        | 2,875       | 1,600         | 9,018          | 173,360        | 248,845    | 5,365         | 5,740         | 5,500           |
| Saboba            | 3,328        | 1,756       | 4,239         | 6,480          | 5,765          | 76,020     | 5,516         | 2,066         | 3,836           |
| Chereponi         | 5,000        | 2,887       | 2,000         | 2,037          | 4,253          | 12,150     | 1,520         | 1,889         | 7,216           |
| Savelugu/Nanton   | 15,159       | 16,384      | 1,430         | 2,940          | 15,851         | 81,200     | 17,000        | 8,000         | 8,600           |
| Sawla/Tuna/Kalba  | 11,625       | 2,508       | 6,405         | 9,100          | 15,664         | 15,600     | 6,020         | 3,150         | 1,105           |
| Tamale Metro      | 12,403       | 13,591      | 1,042         | 3,220          | 9,420          | 60,600     | 328           | 2,596         | 3,360           |
| Sagnerigu         | 7,905        | 3,134       | 87            | 840            | 1,750          | 3,030      | 716           | 1,000         | 1,050           |
| Tolon             | 21,718       | 16,500      | 2,925         | 5,700          | 65,808         | 65,545     | 7,476         | 5,957         | 7,310           |
| Kumbungu          | 8,525        | 10,450      | 1,417         | 2,600          | 8,595          | 9,168      | 1,104         | 805           | 1,573           |
| West Gonja        | 13,750       | 2,464       | 1,750         | 4,130          | 304,500        | 114,000    | 8,158         | 5,750         | 4,050           |
| North Gonja       | 4,800        | 1,080       | 120           | 115            | 11,700         | 1,440      | 4,063         | 184           | 1,144           |

|                                                                                                |                |                |               |                |                  |                  |                |               |                |
|------------------------------------------------------------------------------------------------|----------------|----------------|---------------|----------------|------------------|------------------|----------------|---------------|----------------|
| West Mamprusi                                                                                  | 12,789         | 12,331         | 6,592         | 9,645          | 7,600            | 35,000           | 12,467         | 2,059         | 5,412          |
| Mamprugu Moagduri                                                                              | 9,223          | 3,048          | 1,700         | 1,843          | 6,017            | 1,600            | 13,064         | 6,800         | 478            |
| Yendi                                                                                          | 12,553         | 11,268         | 6,760         | 5,878          | 63,194           | 112,000          | 13,915         | 8,855         | 12,644         |
| Mion                                                                                           | 8,596          | 13,536         | 3,938         | 7,762          | 26,856           | 55,550           | 8,652          | 5,356         | 11,660         |
| Tatale Sanguli                                                                                 | 6,324          | 5,764          | 5,810         | 6,400          | 57,200           | 168,000          | 6,358          | 1,870         | 1,444          |
| Zabzugu                                                                                        | 8,695          | 3,500          | 11,664        | 8,128          | 53,580           | 217,000          | 8,215          | 1,187         | 980            |
| <b>Total</b>                                                                                   | <b>234,888</b> | <b>163,545</b> | <b>87,618</b> | <b>123,562</b> | <b>1,375,152</b> | <b>2,334,528</b> | <b>174,567</b> | <b>90,936</b> | <b>126,759</b> |
| Source: Statistics, Research and Info. Directorate (SRID), Min. of Food & Agric.- March, 2019. |                |                |               |                |                  |                  |                |               |                |

**Table S3: PRODUCTION FOR MAJOR CROPS IN THE NORTHERN REGION - 2019**  
(Figures in Metric Tonnes)

|               | CROPS  |        |        |         |         |         |        |        |         |
|---------------|--------|--------|--------|---------|---------|---------|--------|--------|---------|
| DISTRICT      | MAIZE  | RICE   | MILLET | SORGHUM | CASSAVA | YAM     | G/NUTS | COWPEA | SOYBEAN |
| Kpandai       | 2,203  | 2,188  | 117    | 6,833   | 120,430 | 318,150 | 3,939  | 1,287  | 6,748   |
| Gushiegu      | 9,997  | 6,783  | 4,284  | 4,962   | 67,540  | 28,282  | 9,115  | 3,904  | 7,764   |
| Karaga        | 11,208 | 6,233  | 3,395  | 4,303   | 10,393  | 19,998  | 5,583  | 1,848  | 5,631   |
| Nanumba North | 10,185 | 2,553  | 3,113  | 7,524   | 157,300 | 274,720 | 8,008  | 2,078  | 10,536  |
| Nanumba South | 9,282  | 2,933  | 1,632  | 9,108   | 175,094 | 251,333 | 5,419  | 5,797  | 5,611   |
| Saboba        | 3,394  | 1,791  | 4,324  | 6,545   | 5,823   | 76,780  | 5,571  | 2,086  | 3,913   |
| Savelugu      | 15,462 | 16,711 | 1,459  | 2,969   | 16,010  | 82,012  | 17,170 | 8,080  | 8,773   |
| Nanton        | 7,731  | 8,356  | 729    | 1,485   | 8,005   | 41,006  | 8,585  | 4,040  | 4,386   |
| Tamale Metro  | 12,651 | 13,863 | 1,063  | 3,252   | 9,514   | 61,206  | 332    | 2,621  | 3,428   |
| Sagnerigu     | 8,063  | 3,196  | 89     | 848     | 1,768   | 3,060   | 723    | 1,010  | 1,071   |
| Tolon         | 22,152 | 16,830 | 2,984  | 5,757   | 66,466  | 66,200  | 7,551  | 6,016  | 7,457   |
| Kumbungu      | 8,696  | 10,659 | 1,446  | 2,626   | 8,681   | 9,260   | 1,115  | 813    | 1,605   |
| Yendi         | 12,804 | 11,494 | 6,896  | 5,937   | 63,825  | 113,120 | 14,054 | 8,944  | 12,898  |
| Mion          | 8,768  | 13,806 | 4,017  | 7,839   | 27,124  | 56,106  | 8,739  | 5,410  | 11,894  |

|                                                                                              |                |                |               |               |                |                  |                |               |               |
|----------------------------------------------------------------------------------------------|----------------|----------------|---------------|---------------|----------------|------------------|----------------|---------------|---------------|
| Tatale Sanguli                                                                               | 6,450          | 5,880          | 5,927         | 6,464         | 57,772         | 169,680          | 6,422          | 1,889         | 1,473         |
| Zabzugu                                                                                      | 8,869          | 3,570          | 11,898        | 8,209         | 54,116         | 219,170          | 8,297          | 1,199         | 1,000         |
| <b>Total</b>                                                                                 | <b>157,915</b> | <b>126,845</b> | <b>53,373</b> | <b>84,662</b> | <b>849,862</b> | <b>1,790,083</b> | <b>110,622</b> | <b>57,021</b> | <b>94,188</b> |
| Source: Statistics, Research and Info. Directorate (SRID), Min. of Food & Agric.- May, 2020. |                |                |               |               |                |                  |                |               |               |

**Table S4: PRODUCTION FOR MAJOR CROPS IN THE NORTH EAST REGION - 2019**  
(Figures in Metric Tonnes)

|                                                                                              | CROPS         |               |               |               |               |               |               |               |               |
|----------------------------------------------------------------------------------------------|---------------|---------------|---------------|---------------|---------------|---------------|---------------|---------------|---------------|
| DISTRICT                                                                                     | MAIZE         | RICE          | MILLET        | SORGHUM       | CASSAVA       | YAM           | G/NUTS        | COWPEA        | SOYBEAN       |
| Bunkpurugu<br>Nyankpanduri                                                                   | 2,693         | 539           | 4,752         | 3,989         | 5,216         | 6,292         | 2,896         | 6,199         | 6,121         |
| Yunyoo-Nasuan                                                                                | 2,693         | 539           | 4,752         | 3,989         | 5,216         | 6,292         | 2,896         | 6,199         | 6,121         |
| East Mamprusi                                                                                | 4,378         | 6,658         | 10,297        | 4,547         | 2,450         | 4,560         | 5,741         | 6,778         | 6,352         |
| Chereponi                                                                                    | 5,100         | 2,945         | 2,040         | 2,057         | 4,296         | 12,272        | 1,535         | 1,907         | 7,361         |
| West Mamprusi                                                                                | 13,045        | 12,578        | 6,725         | 9,742         | 6,080         | 8,715         | 12,592        | 2,080         | 5,521         |
| Mamprugu Moagduri                                                                            | 9,407         | 3,109         | 1,734         | 1,861         | 6,077         | 1,616         | 13,195        | 6,868         | 487           |
| <b>Total</b>                                                                                 | <b>37,315</b> | <b>26,366</b> | <b>30,301</b> | <b>26,184</b> | <b>29,334</b> | <b>39,746</b> | <b>38,854</b> | <b>30,031</b> | <b>31,962</b> |
| Source: Statistics, Research and Info. Directorate (SRID), Min. of Food & Agric.- May, 2020. |               |               |               |               |               |               |               |               |               |

**Table S5: PRODUCTION FOR MAJOR CROPS IN THE SAVANNA REGION - 2019**  
(Figures in Metric Tonnes)

|          | CROPS |      |        |         |         |     |        |        |         |
|----------|-------|------|--------|---------|---------|-----|--------|--------|---------|
| DISTRICT | MAIZE | RICE | MILLET | SORGHUM | CASSAVA | YAM | G/NUTS | COWPEA | SOYBEAN |

|                                                                                              |               |               |               |               |                |                |               |               |               |
|----------------------------------------------------------------------------------------------|---------------|---------------|---------------|---------------|----------------|----------------|---------------|---------------|---------------|
| Bole                                                                                         | 8,140         | 1,346         | 750           | 4,009         | 45,450         | 84,032         | 2,527         | 1,313         | 1,224         |
| Central Gonja                                                                                | 6,558         | 5,255         | 500           | 1,111         | 37,216         | 55,853         | 5,681         | 1,345         | 1,530         |
| East Gonja                                                                                   | 4,651         | 4,862         | 748           | 414           | 49,609         | 136,143        | 5,843         | 1,600         | 2,242         |
| Sawla/Tuna/Kalba                                                                             | 11,858        | 2,558         | 6,534         | 9,191         | 15,821         | 15,756         | 6,080         | 3,182         | 1,127         |
| West Gonja                                                                                   | 14,025        | 2,513         | 1,785         | 4,171         | 307,545        | 115,140        | 8,239         | 5,808         | 4,131         |
| North Gonja                                                                                  | 4,896         | 3,100         | 1,229         | 1,485         | 15,600         | 11,760         | 4,104         | 1,565         | 2,416         |
| North East Gonja                                                                             | 4,651         | 4,862         | 748           | 414           | 49,609         | 136,143        | 5,843         | 1,600         | 2,242         |
| <b>Total</b>                                                                                 | <b>54,779</b> | <b>24,497</b> | <b>12,294</b> | <b>20,794</b> | <b>520,849</b> | <b>554,827</b> | <b>38,317</b> | <b>16,412</b> | <b>14,912</b> |
| Source: Statistics, Research and Info. Directorate (SRID), Min. of Food & Agric.- May, 2020. |               |               |               |               |                |                |               |               |               |
